## Correction

# Correction: Living with Lions: The Economics of Coexistence in the Gir Forests, India

**The PLOS ONE Staff**

This article was republished on January 27, 2014, due to missing symbols in the text. Please download the article again to view the correct version. The originally published, uncorrected article is provided here as File S1 for reference.

**Supporting Information**

**File S1** Originally published, uncorrected article.  
(PDF)

**Reference**

1. Banerjee K, Jhala YV, Chauhan KS, Dave CV (2013) Living with Lions: The Economics of Coexistence in the Gir Forests, India. PLoS ONE 8(1): e49457. doi:10.1371/journal.pone.0049457.

---

**Citation:** The PLOS ONE Staff (2014) Correction: Living with Lions: The Economics of Coexistence in the Gir Forests, India. PLoS ONE 9(2): e89708. doi:10.1371/journal.pone.0089708

**Published:** February 26, 2014

**Copyright:** © 2014 The PLOS ONE Staff. This is an open-access article distributed under the terms of the Creative Commons Attribution License, which permits unrestricted use, distribution, and reproduction in any medium, provided the original author and source are credited.
